# Supplementary material for: Comb-like poly(l-cysteine) derivatives with different side groups: synthesis via photochemistry and click chemistry, multi-responsive nanostructures, triggered drug release and cytotoxicity
Source: Royal Society of Chemistry journal article supplement (doi:10.1039/c5py01113b), 2015-01-01
Supplement: c5py01113b1.pdf [file c5py01113b1.pdf]

## Supporting Information

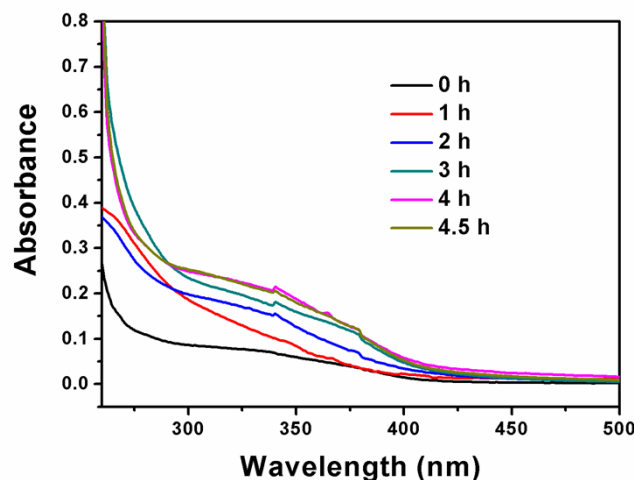

**Figure S1.** UV-vis spectra of 0.5 mg/mL  $^L$ PNBC<sub>10</sub> in mixed solvents (DMSO/acetonitrile = 6/4, v/v) after 365 nm irradiation of different times. The photolysis ratio can also be calculated by  $^1$ H NMR and/or from the change of the absorbance at 310 nm at different times according to our previous publications.<sup>1,2</sup>

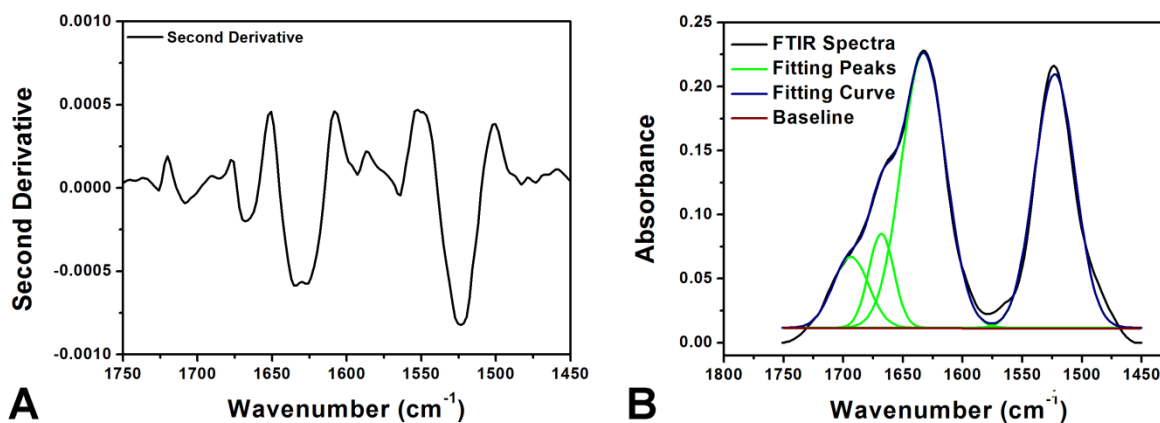

**Figure S2.** (A) Second derivative and (B) FT-IR spectra and the related fitting curve and fitting peaks for  $^L$ PNBC<sub>10</sub> as an example.

**Table S1.** Secondary conformations of the graft polypeptides 1, 2, and 3 in solid state.

| Entry                           | $\beta$ -sheet (%) | Others (%) |
|---------------------------------|--------------------|------------|
| <sup>L</sup> PNBC <sub>10</sub> | 83.6               | 16.4       |
| 1a                              | 44.6               | 55.4       |
| 1b                              | 32.9               | 67.1       |
| 1c                              | 25.4               | 74.6       |
| 2a                              | 37.5               | 62.5       |
| 2b                              | 14.6               | 85.4       |
| 3a                              | 34.0               | 66.0       |
| 3b                              | 19.4               | 80.6       |

**Table S2.** The secondary conformations of 1, 2, and 3 in aqueous solution.

| Entry | $\alpha$ -helix (%) | $\beta$ -sheet (%) | Trn <sup>a</sup> (%) | Unrd <sup>b</sup> (%) |
|-------|---------------------|--------------------|----------------------|-----------------------|
| 1a    | 16.0                | 36.5               | 17.1                 | 30.4                  |
| 1b    | 21.8                | 28.5               | 24.6                 | 25.1                  |
| 1c    | 40.7                | 9.1                | 26.8                 | 23.4                  |
| 2a    | 4.0                 | 40.9               | 23.0                 | 32.2                  |
| 2b    | 16.7                | 24.0               | 25.7                 | 33.6                  |
| 3a    | 10.8                | 38.6               | 26.5                 | 24.1                  |
| 3b    | 17.1                | 25.2               | 26.8                 | 30.9                  |

a: Trn denotes turn; b: Unrd denotes unordered structures; all these data were calculated by using the CDPRO software according to a continll method.

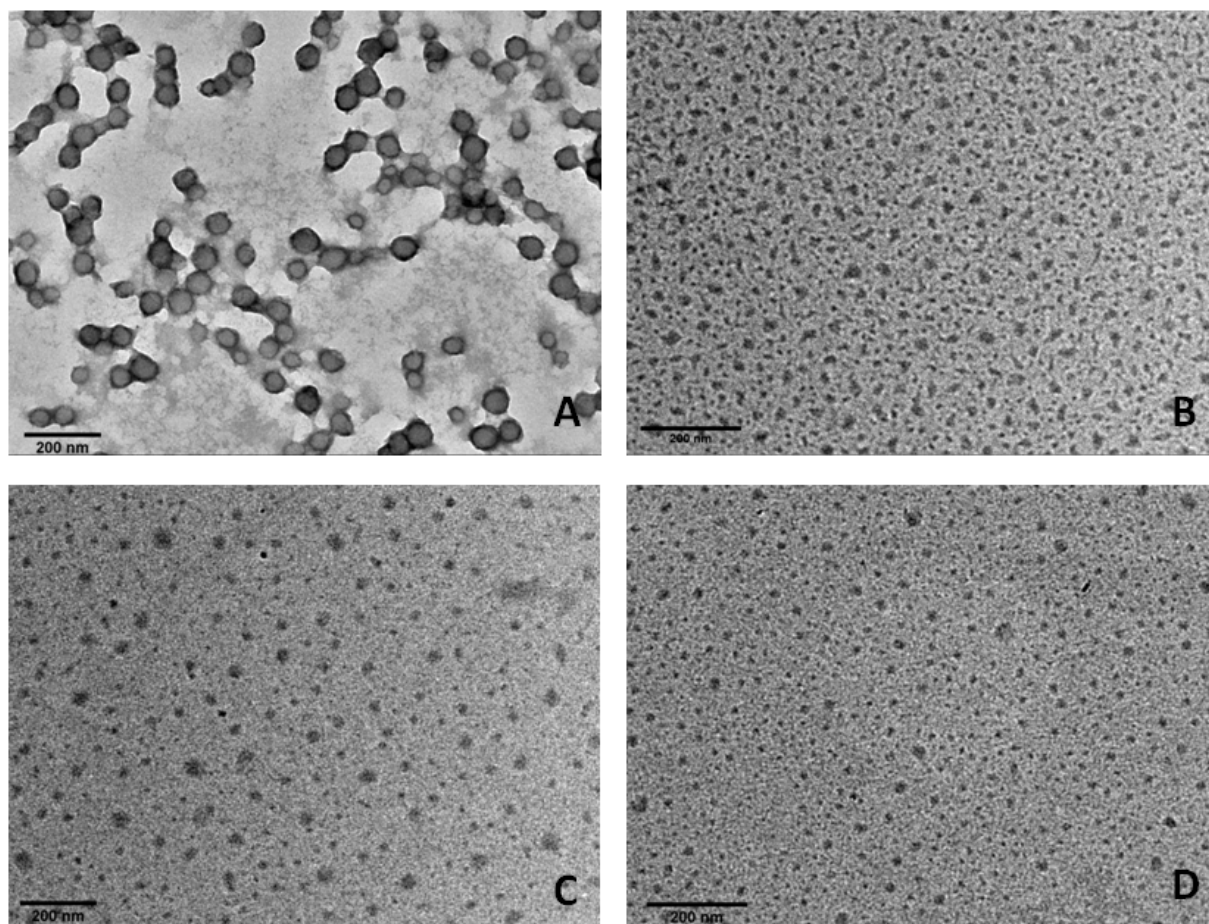

**Figure S3.** TEM images of 2a (A) and the pH (pH = 12) induced micelles from 2a (B); the self-assembled micelles of 3a (C) and those at pH 2 (D).

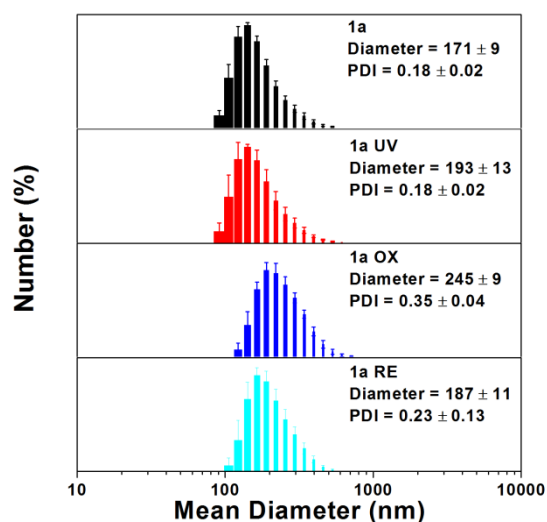

**Figure S4.** DLS curves of 1a nanoparticles and those upon multi-stimulation.

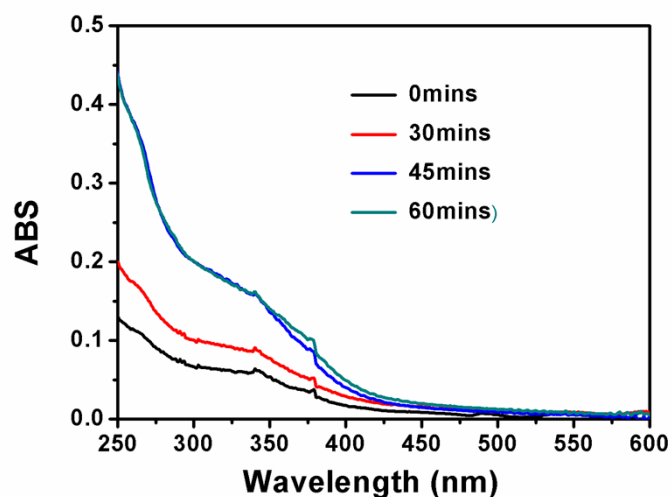

**Figure S5.** UV-vis spectra of aqueous solution of 0.5 mg/mL **1a** after 365 nm irradiation of different times.

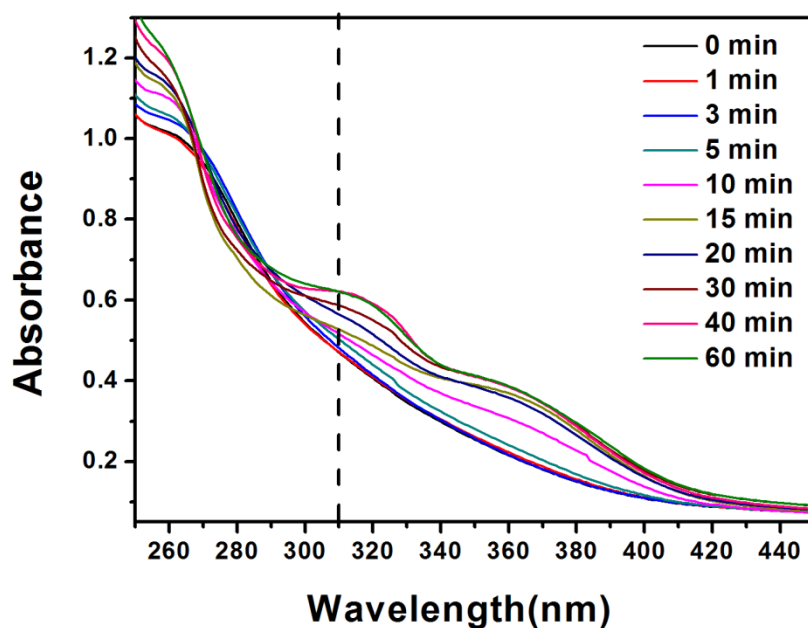

**Figure S6.** UV-vis spectra of aqueous solution of 1 mg/mL **4b** after 365 nm irradiation of different times. Note: The photolysis ratio of **4b** was calculated by  $^1\text{H}$  NMR and/or from the change of the absorbance at 310 nm at different times according to our previous publications.<sup>1,2</sup>

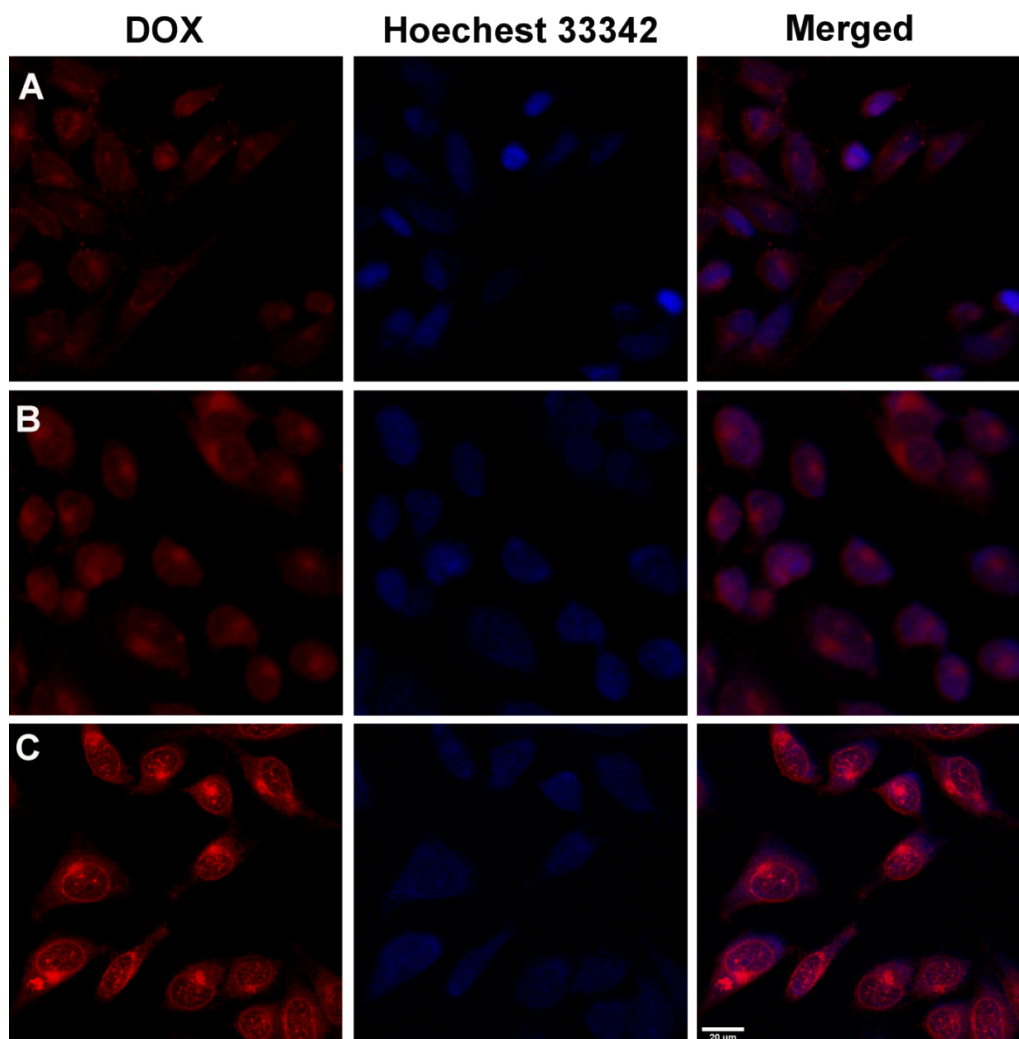

**Figure S7.** CLSM images of HeLa cells incubated with the DOX-loaded nanoparticles at the predetermined time intervals of 1 h (A), 2 h (B), and 4 h (C).

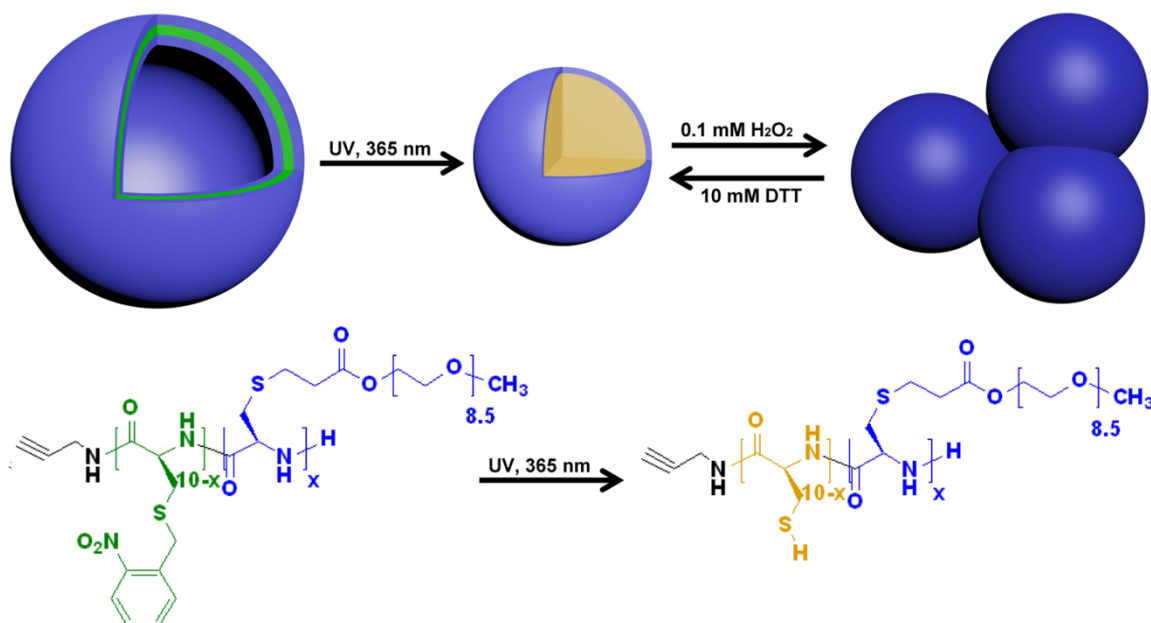

**Scheme S1.** The photo- and redox-sensitive self-assembly of 1a nanoparticles in aqueous solution.

## Notes and references

1 G. Liu and C-M. Dong, *Biomacromolecules*, 2012, **12**, 1573-1583.

2 G. Liu, L. Zhou, Y. Guan, Y. Su and C-M. Dong, *Macromol. Rapid. Commun.*, 2014, **35**, 1673-1678.
